# Supplementary material for: Loss of ARHGEF1 causes a human primary antibody deficiency
Source: JCI journal article supplement (doi:10.1172/jci120572), 2018-12-06
Supplement: sd1 [file 1]

## Supplementary Information

**Supplementary Table 1. Annotated nonsense mutations in the *ARHGEF1* gene (as of January 2018).**

| EXON | Type of mutation | Consequence | rs number | Minor allele frequency | Database |
|------|------------------|-------------|-----------|------------------------|----------|
| 2    | nonsense         | 7WX*        | 782018258 | 0.00001                | ExAC     |
| 12   | nonsense         | R300X       |           |                        |          |
| 14   | nonsense         | E386X       | 370619761 | 0.00008                | ESP      |
| 17   | nonsense         | Y502X       | 782346763 | 0.000008               | dbSNP    |
| 18   | splice-site      | E557Kfs34X  |           |                        |          |
| 24   | nonsense         | Q758X       | 781877132 | 0.000004               | ExAC     |
| 24   | nonsense         | S761X       | 138482475 | 0.000004               | ExAC     |
| 28   | nonsense         | Q851X       | 45580632  | 0.000005               | ExAC     |
| 28   | nonsense         | Q883X       | 782187203 | 0.000004               | ExAC     |

ExAC: Exome Aggregation Consortium; ESP: Exome Sequencing Project; dbSNP: Short

Genetic Variations Database; \* only present in NM\_199002.1, the longest annotated

ARHGEF1 transcript; variations investigated in the present study are shown in blue

type.

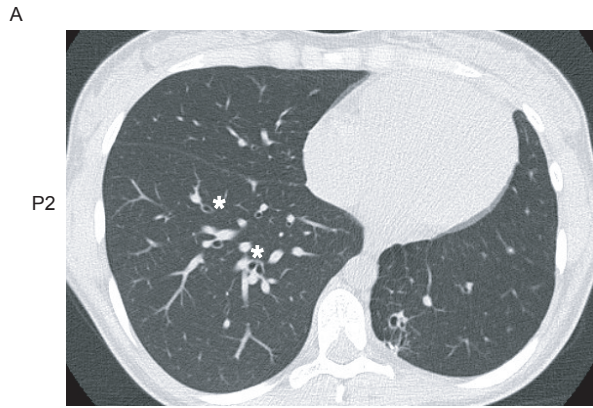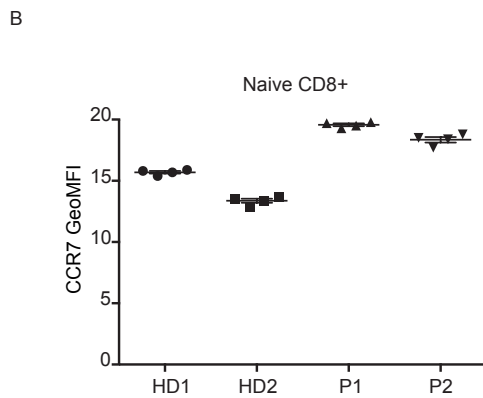

**Supplementary Information Figure 1. Patients with ARHGEF1 deficiency display bronchiectasis and elevated CCR7 expression in the naïve CD8+ compartment.**

**A)** Thoracic computed tomography scans of P1's lungs at the age of 20, showing mild bronchiectasis (white stars) and a small left lower lobe (due to previous lobectomy). **B)** Dot plot of a representative experiment showing the expression of CCR7 in the naïve CD8+ T cell population in blood samples from healthy donors (HD1, circle; HD2, square) and patients (P1, up-pointing triangle; P2 down pointing triangle). Each blood sample was stained and analyzed four times. The experiment was performed twice.

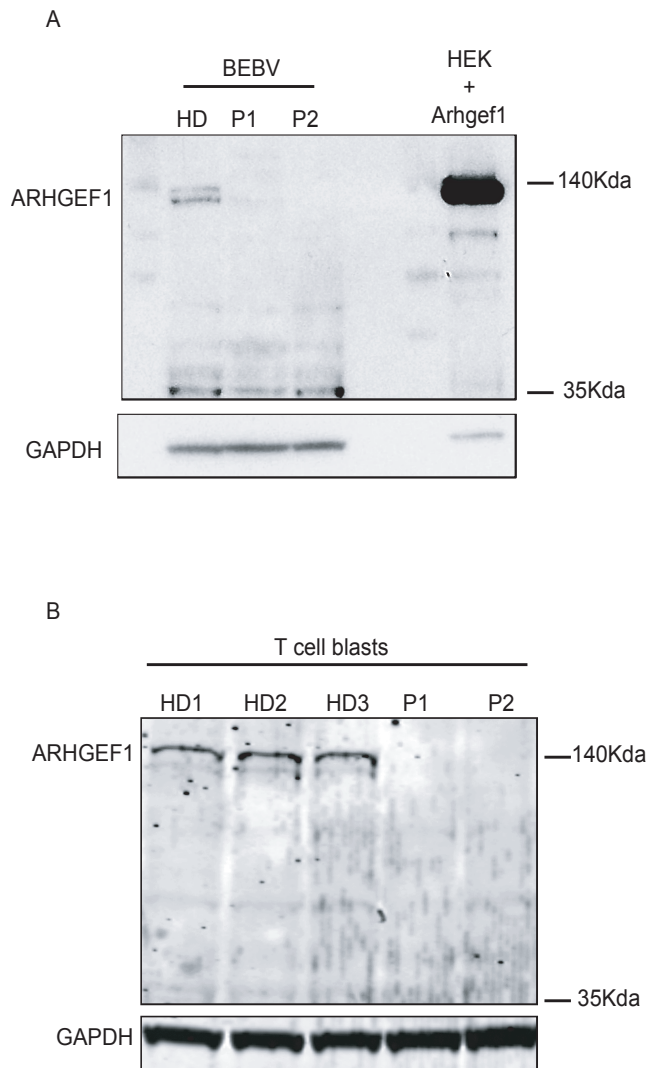

**Supplementary Information Figure 2. Effect of *ARHGEF1* splice-site mutation and the absence of *ARHGEF1* truncated proteins in patients' cells**

**A and B)** Western blots of *ARHGEF1* expression in (A) B-EBV cell lines and (B) T cell blasts derived from patients (P1 and P2) and healthy donors (HD, n=3). Lysates of HEK 293 cells over-expressing *ARHGEF1*' protein were used to confirm the specificity of the antibody raised against the N-terminal part of *ARHGEF1*. GAPDH was included as loading control.

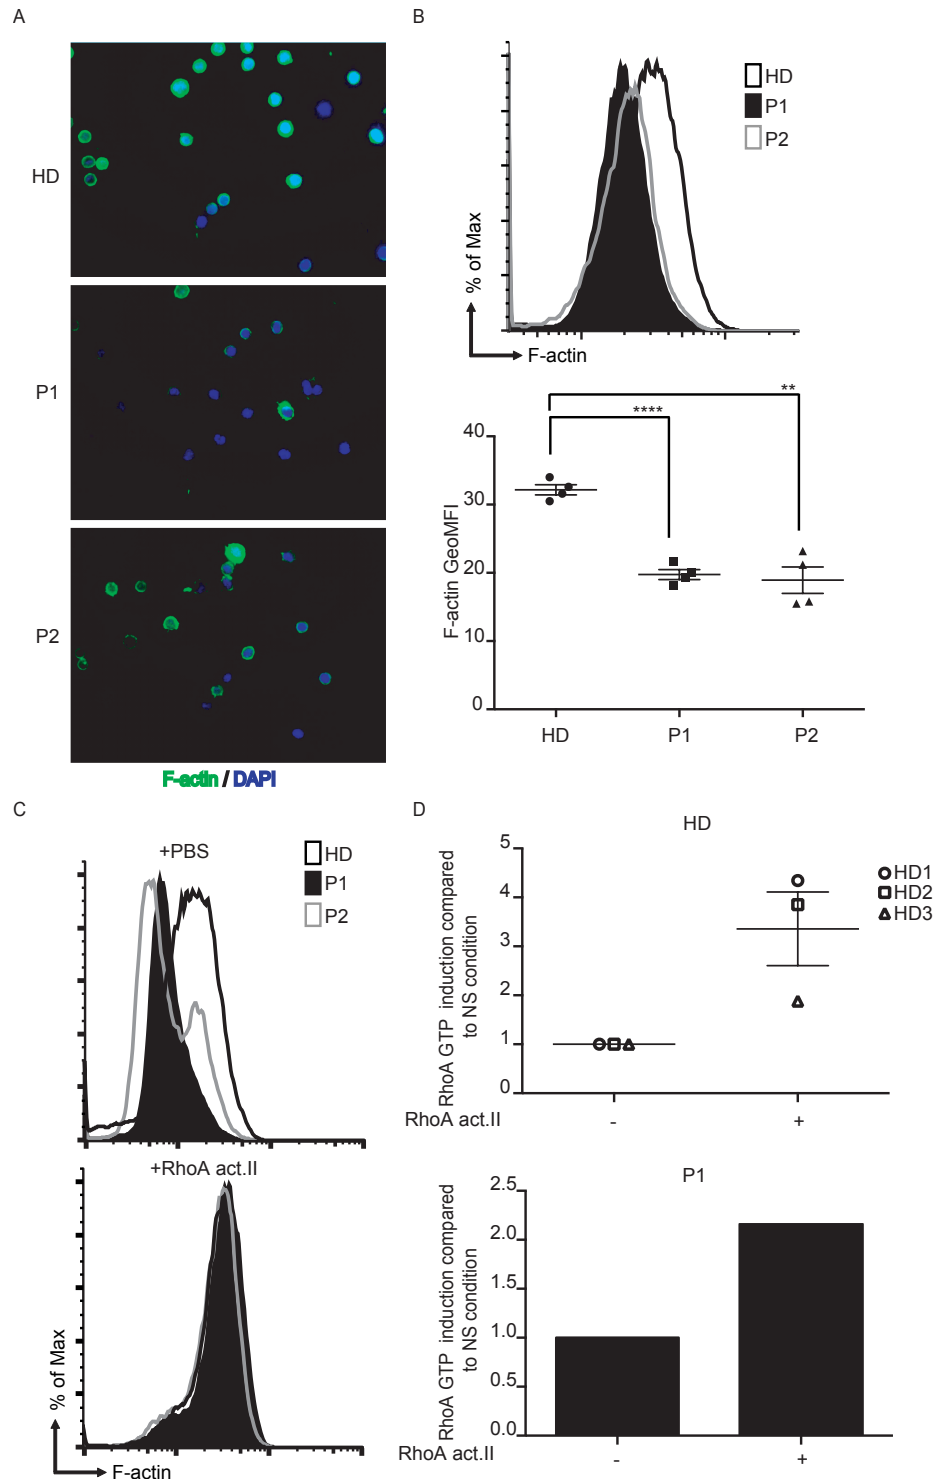

**Supplementary Information Figure 3. Cultured T cell blasts derived from the patients recapitulate the F-actin defects observed *ex vivo***

**A)** Representative image of polymerized actin (F-actin) staining in T cell blasts derived from P1, P2 and a healthy donor (HD). DAPI staining highlights the nuclei

(magnification: x25). The experiment was performed twice. **B)** Representative FACS analysis of F-actin content in T cell blasts derived from patients and HDs. Dot plot of the geometric mean fluorescence intensity of F-actin (as determined by FACS) of a representative experiment in which T cell blasts from each culture (HD, circle; P1, square; P2, triangle) were stained and analyzed four times. \*\*:p<0.01 and \*\*\*\*: p<0.0001 and in a 2-tailed Welch t-test. The experiment was performed 4 times. **C)** FACS plot showing the effect of the RhoA activator II (RhoA act., 32 µg/ml for 1hour) on actin polymerization in T cell blasts from patients and HD. The experiment was performed twice with T cell blasts from the same culture from P2 and the HD. **D)** ELISA measurement of active RhoA (RhoA GTP) after stimulation with RhoA activator II as in C. HD (n=3), P1 (n=1).

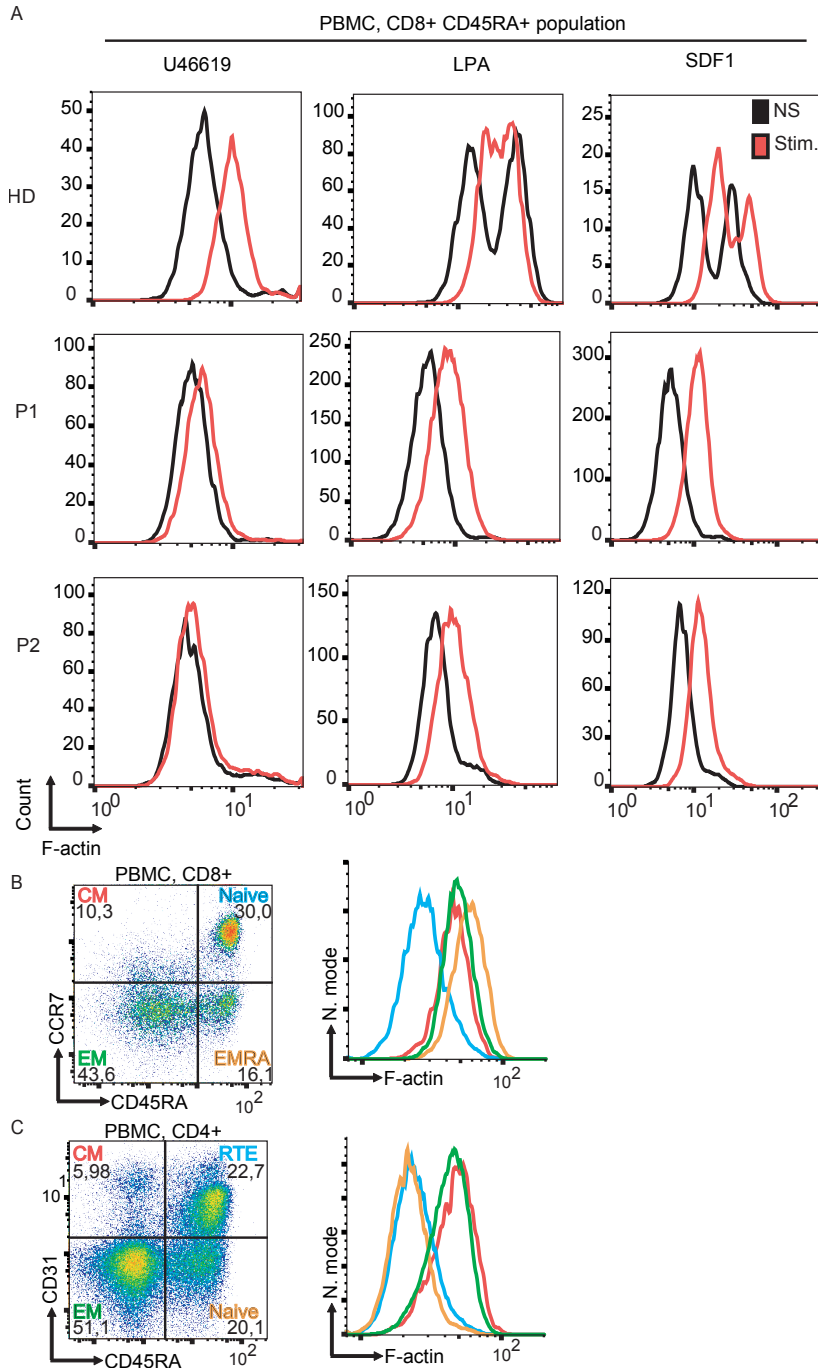

**Supplementary Information Figure 4. F-actin polymerization in CD8+CD45RA+ T cells after stimulation with lysophospholipids**

**A)** Representative FACS analyses showing the induction of actin polymerization in the CD8+CD45RA+ T cell compartment of PBMCs from P1, P2 and a healthy donor (HD) treated with various lysophospholipids. The experiment was performed twice. Cells were stimulated with S1P (10  $\mu$ M for 1 min), the thromboxane analogue U46619 (1  $\mu$ M

for 1 min) and LPA (7.7  $\mu$ M for 15 mins). Stimulation with SDF1 (3ug/ml for 1 min) was assessed as a lysophospholipid-independent means of inducing actin polymerization. **B and C)** Representative FACS analysis of the level of polymerized actin (F-actin) in the different populations of CD8 (B) and CD4 (C) T cells from an HD. RTE: recent thymic emigrant cells; CM: central memory; EM: effector memory; EMRA: terminally differentiated effector memory cells. The experiment presented in **B** and **C** was performed 3 times.

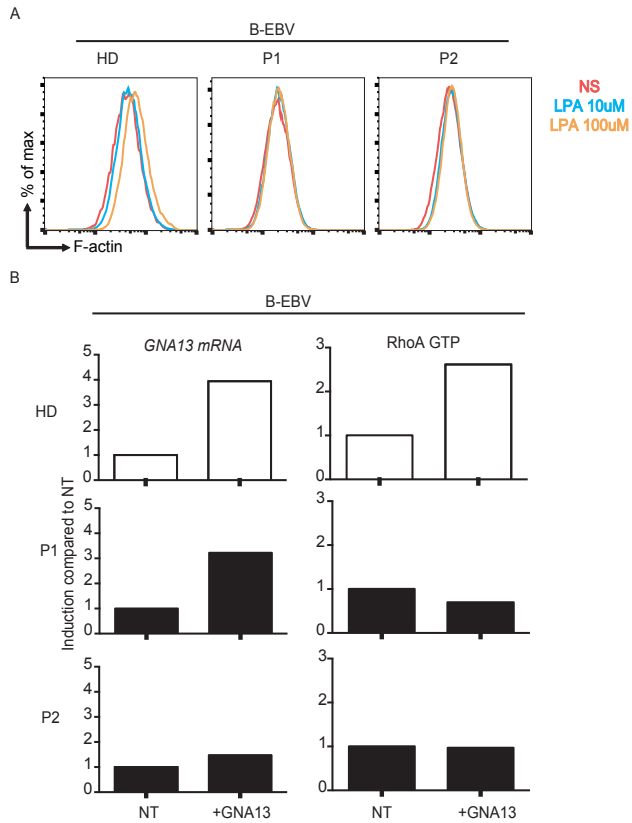

**Supplementary Information Figure 5. B-EBV cells from patients exhibit impaired lysophospholipid activation of actin polymerization and Ga13-mediated RhoA activation**

**A)** Representative FACS analysis of actin polymerization in B-EBV cell derived from patients and a healthy donor after stimulation (15mins) with the indicated dose of LPA. NS, non stimulated. The experiment was performed twice. **B)** *GNA13* mRNA level and the corresponding activity of RhoA measured by ELISA after lentiviral transduction of full length *GNA13* construct in a healthy donor and patients derived B-EBV cells. NT, not transduced cells. The experiment was performed once.



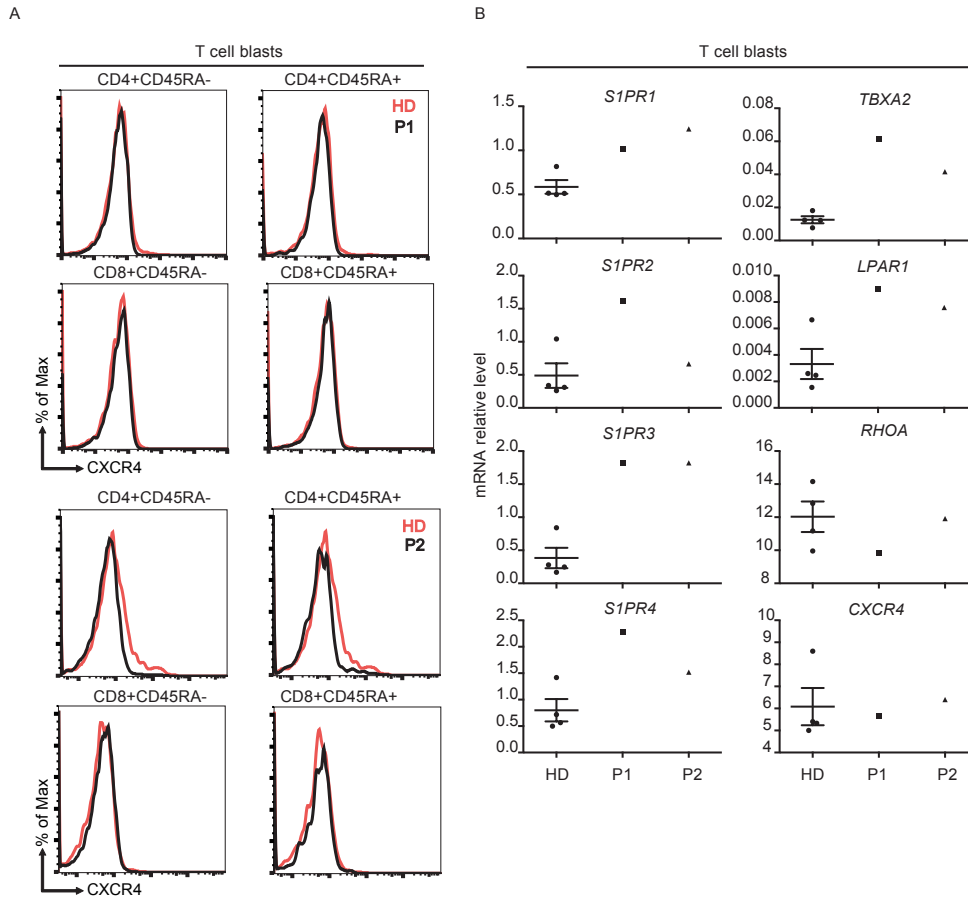

**Supplementary Information Figure 6. CXCR4 and lysophospholipids receptors expressions are maintained in patients cells with ARHGEF1 deficiency**

**A)** FACS analysis of two independent experiments showing surface expression of CXCR4 in the naïve (CD4+CD45RA+) and memory (CD4+CD45RA-) CD4 T cells compartments in patients (P1 and P2) and healthy donors T cell blasts cultures. The experiment was performed 3 times (HD, n=3; P1, n=1 and P2, n=2). **B)** mRNA expression analysis of the indicated lysophospholipid receptors in healthy donor (HD, n=4) and patients (P1, n=1 and P2, n=1) T cell blast cultures.

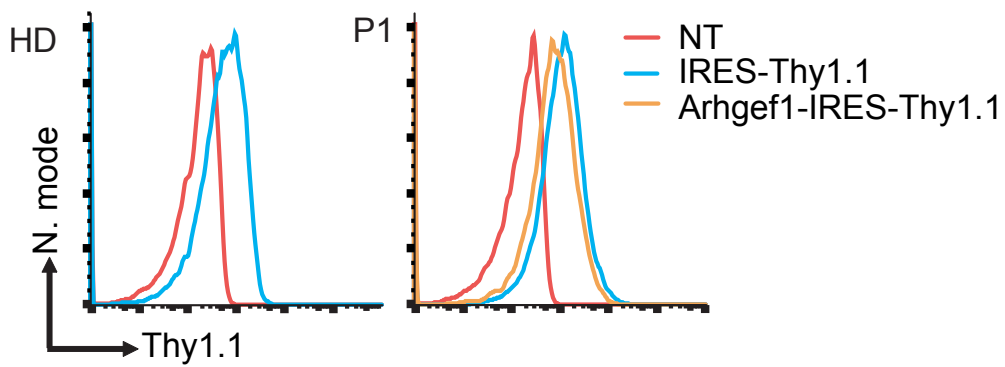

**Supplementary Information Figure 7. Evaluation of ARHGEF1 retroviral transduction efficiency**

FACS plots showing the efficiency of retroviral transduction for either a Thy1.1 or Thy1.1 plus ARHGEF1 construction, followed by the expression of the Thy1.1 marker in T cell blasts from a healthy donor and from P1 48 hours post-transduction. NT, not transduced cells. The experiment was performed 4 times.

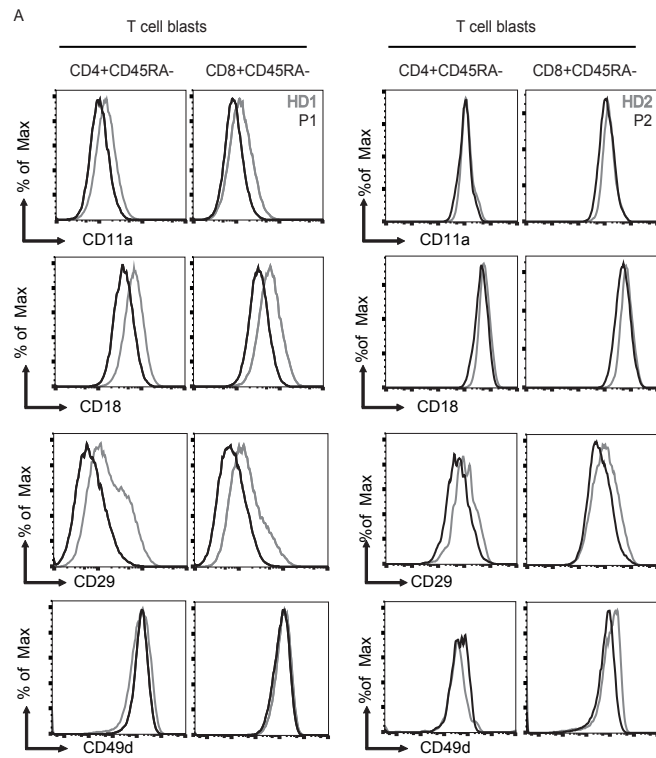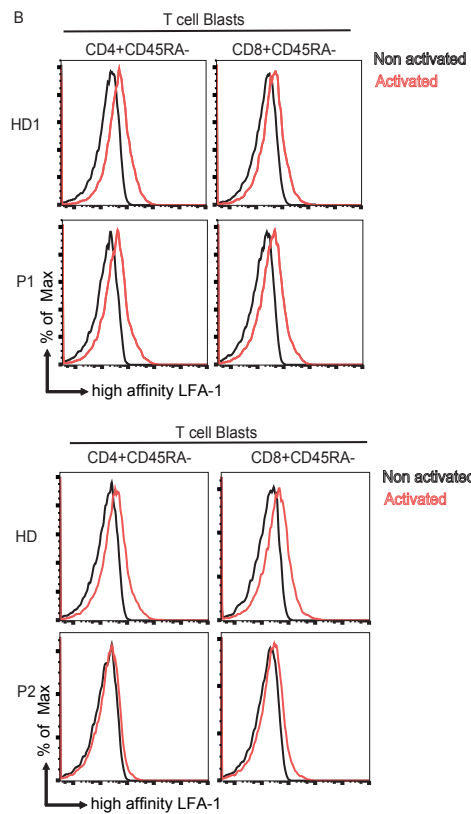

**Supplementary Information Figure 8. Integrin surface expression in patients cells**

**A)** FACS analysis of two independent experiments showing the expression of LFA-1 and VLA-4 components in patients and healthy donor T cell blasts. **B)** FACS plots of two independent experiments showing high affinity LFA-1 surface expression in patients and healthy donors T cell blasts in non activating (EDTA 10mM) or activating (MgCL<sub>2</sub>, 1mM and SDF1, 100ng/ml) conditions. The experiment presented in **A** and **B** was performed twice for P1 and once for P2.

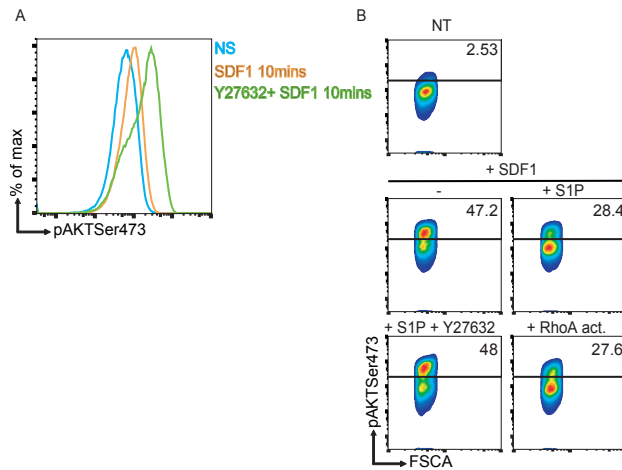

### Supplementary Information Figure 9. RhoA-ROCK activation regulates AKT pathway in human T cell blasts cultures

**A)** FACS plot showing the level of AKTSer473 after T cell blasts stimulation with SDF1 (6ug/ml for 10 mins) alone or after a pre-treatment with the Y27632 (0.6 mg/ml, a 1-hour pre-treatment). **B)** FACS plots showing the requirement for a functional RhoA-ROCK pathway in the control of AKT phosphorylation (Ser473) in T cell blasts from a healthy donor (HD). Cells were stimulated with SDF1 (6ug/ml for 10 mins) and S1P (20  $\mu$ M for 10 mins) in the presence of the ROCK inhibitor Y27632 (0.6 mg/ml, a 1-hour pre-treatment) or the RhoA activator II (RhoA act., 16  $\mu$ g/ml, a 3-hour pre-treatment). Experiments presented in **A** and **B** were performed twice.

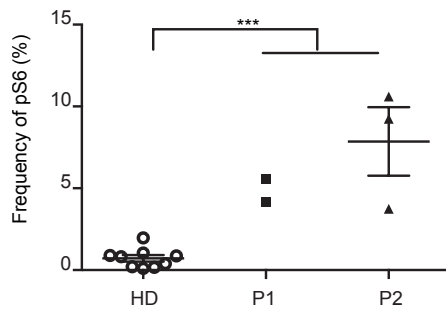

**Supplementary Information Figure 10. Patients' B lymphocytes display elevated levels of pS6 phosphorylation**

Dot plot showing the frequency of B cells (CD19+) with a high level of S6 Serine 235/236 phosphorylation (pS6) in fresh blood samples from patients and healthy donors (HDs) less than 4 h after sampling. \*\*\*:  $p < 0.001$  in a Mann-Whitney test. The results correspond to independent blood samples for HDs (circles;  $n=9$ ), P1 (squares;  $n=2$ ) and P2 (triangles;  $n=3$ ).
